# Supplementary material
Source: ML conference proceedings conference paper supplement (https://openaccess.thecvf.com/content/CVPR_2019/html/Huang_Motion_Estimation_of_CVPR_2019_paper.html)
Supplement: Supplementary file 1 [file Huang_Motion_Estimation_of_CVPR_2019_supplemental.pdf]

Archive with 4 entries (3 files):
- 6388-supp/
- 6388-supp/README.txt
- 6388-supp/Supplementary Material.pdf
- 6388-supp/demo.mp4
