# Supplementary material
Source: ML conference proceedings conference paper supplement (https://openaccess.thecvf.com/content/CVPR_2019/html/Huang_Motion_Estimation_of_CVPR_2019_paper.html)
Supplement: Supplementary file 1 [file Huang_Motion_Estimation_of_CVPR_2019_supplemental.pdf › 6388-supp/README.txt]

Video is coded in H.264
The codec download link is https://www.divx.com/en/software/technologies/h264
