# Supplementary material
Source: ML conference proceedings conference paper supplement (https://openaccess.thecvf.com/content/CVPR_2019/html/Huang_Motion_Estimation_of_CVPR_2019_paper.html)
Supplement: Supplementary file 1 [file Huang_Motion_Estimation_of_CVPR_2019_supplemental.pdf › 6388-supp/Supplementary Material.pdf]

# Motion estimation of non-holonomic ground vehicles from a single feature correspondence measured over n views

Anonymous CVPR submission

Paper ID 6388

## 1. Supplementary Material

As shown in the paper, we have the  $n$ -linear form

$$\begin{bmatrix} (x_{\mathbf{n}_0} \ y_{\mathbf{n}_0}) \begin{pmatrix} C_0 & -S_0 & \frac{1+z^2}{2z}((1+z^2)^{(n-1)} - C_0) \\ S_0 & C_0 & -\frac{1+z^2}{2z}S_0 \end{pmatrix} \\ \dots \\ (x_{\mathbf{n}_{n-1}} \ y_{\mathbf{n}_{n-1}}) \begin{pmatrix} C_{n-1} & -S_{n-1} & \frac{1+z^2}{2z}((1+z^2)^{(n-1)} - C_{n-1}) \\ S_{n-1} & C_{n-1} & -\frac{1+z^2}{2z}S_{n-1} \end{pmatrix} \end{bmatrix} \begin{bmatrix} x \\ y \\ d \end{bmatrix} = \mathbf{0}, \quad (1)$$

where

$$\begin{cases} C_i = (1+z^2)^{n-1-i} \sum_{k=0}^{2k \leq i} (-1)^k \binom{i}{2k} (1-z^2)^{i-2k} (2z)^{2k} \\ S_i = (1+z^2)^{n-1-i} \sum_{k=0}^{2k+1 \leq i} (-1)^k \binom{i}{2k+1} (1-z^2)^{i-2k-1} (2z)^{2k+1} \end{cases} \quad (2)$$

This is of the form  $\mathbf{Ax} = 0$ , and  $\mathbf{A} = [\mathbf{a}, \mathbf{b}, \mathbf{c}]$ .

Here we show the form of the matrix if taking multiple correspondences into account. Multiple constraints of the above form can be stacked into a large linear problem, where

$$\begin{bmatrix} \mathbf{a}_0 & \mathbf{b}_0 & & & & \mathbf{c}_0 \\ & & \mathbf{a}_1 & \mathbf{b}_1 & & \mathbf{c}_1 \\ & & & & \dots & \dots \\ & & & & & \mathbf{a}_{j-1} \ \mathbf{b}_{j-1} \ \mathbf{c}_{j-1} \end{bmatrix} \begin{bmatrix} x_0 \\ y_0 \\ \dots \\ x_{j-1} \\ y_{j-1} \\ d \end{bmatrix} = \mathbf{0} \quad (3)$$
